# Supplementary material for: Intein splicing efficiency and RadA levels can control the mode of archaeal DNA replication
Source: PubMed Central journal article supplement — Sci Adv. 2024 Sep 18;10(38):eadp4995. doi: 10.1126/sciadv.adp4995 (PMC11409957; doi:10.1126/sciadv.adp4995), 2024-09-18
Supplement: sciadv.adp4995_sm.pdf [file sciadv.adp4995_sm.pdf]

Supplementary Materials for  
**Intein splicing efficiency and RadA levels can control the mode of archaeal  
DNA replication**

Gerald L. S. Liman *et al.*

Corresponding author: Christopher W. Lennon, [clennon1@murraystate.edu](mailto:clennon1@murraystate.edu);  
Thomas J. Santangelo, [thomas.santangelo@colostate.edu](mailto:thomas.santangelo@colostate.edu)

*Sci. Adv.* **10**, eadp4995 (2024)  
DOI: 10.1126/sciadv.adp4995

**This PDF file includes:**

Figs. S1 to S4



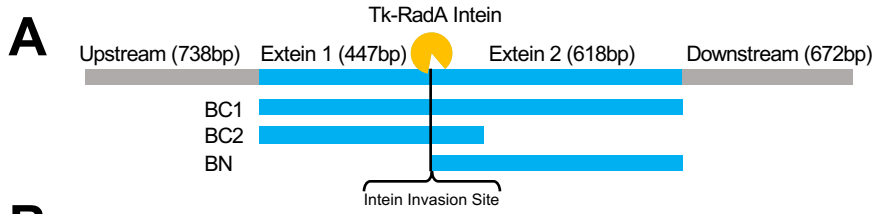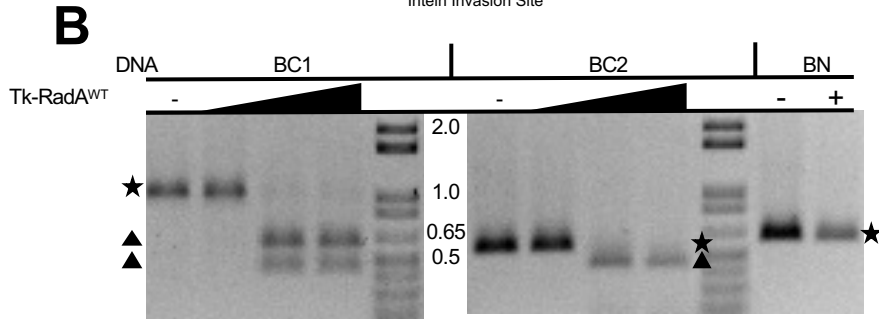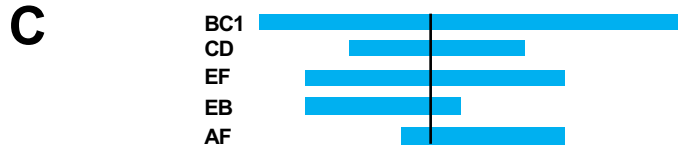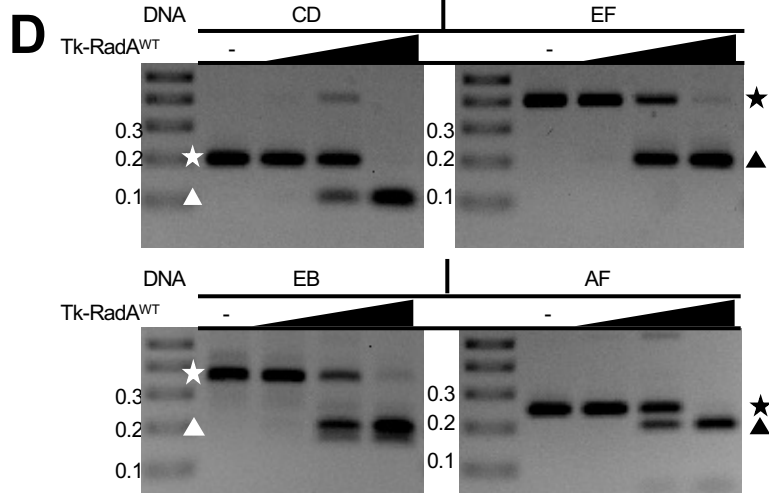

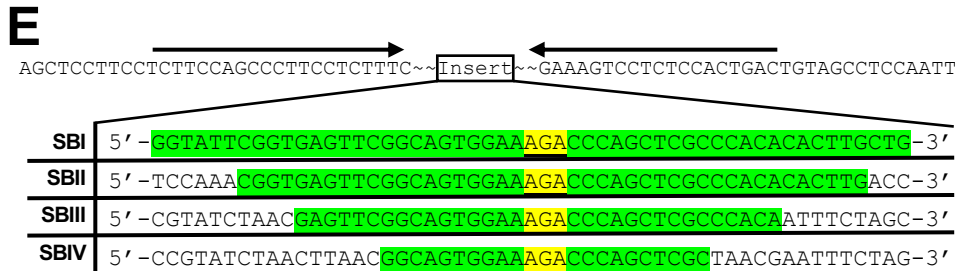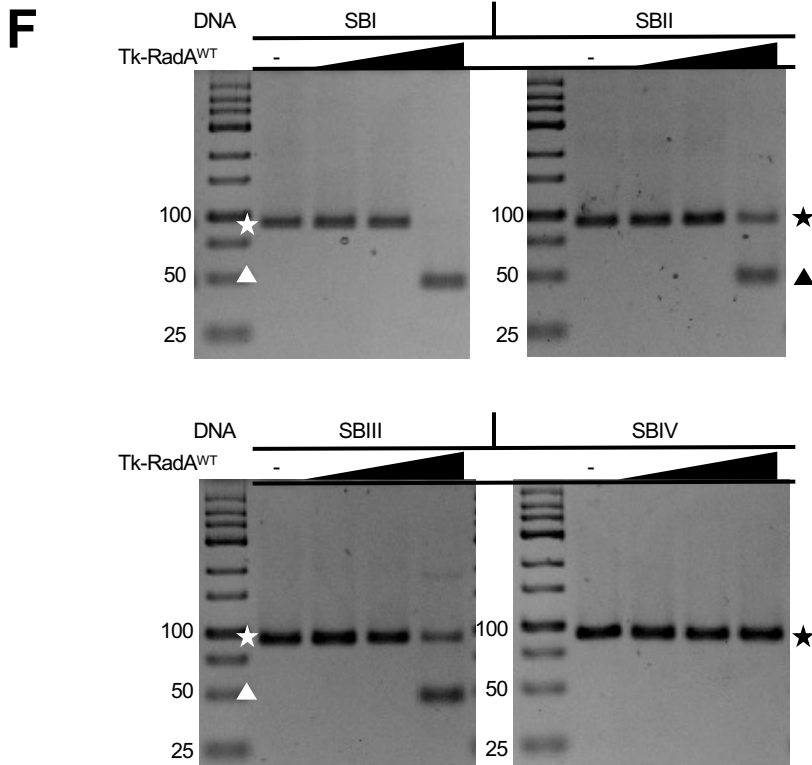

**Fig. S2. Defining the minimum recognition sequence necessary for HEN-initiated DNA cleavage of intein-less alleles.**

(A, C, E) Diagrams and sequences of the DNA fragments generated and tested to narrow the recognition site of Tk-RadA HEN activity. Grey and blue bars denote surrounding and TK1899 intein-encoding sequences, respectively. The black line denotes the HEN cut site. Artificial substrates with decreasing sequences derived from TK1899 (highlighted in green) were inserted into the Blue Heron pUC MinusMCS vector, from which amplicons were generated to assay HEN activities. (B, D, F) HEN assays monitor the ability of purified Tk-RadA<sup>WT</sup> protein to recognize amplicons containing targeting sequences and cleave the DNA fragments. HEN activities of Tk-RadA<sup>WT</sup> are detected against DNA sequences containing at least 30 bp of the cut site but not detected when only 20 bp sequence surrounding the cut site are available within the amplicon. Intact DNA target and cleaved DNA target(s) are denoted as a star and triangles, respectively.

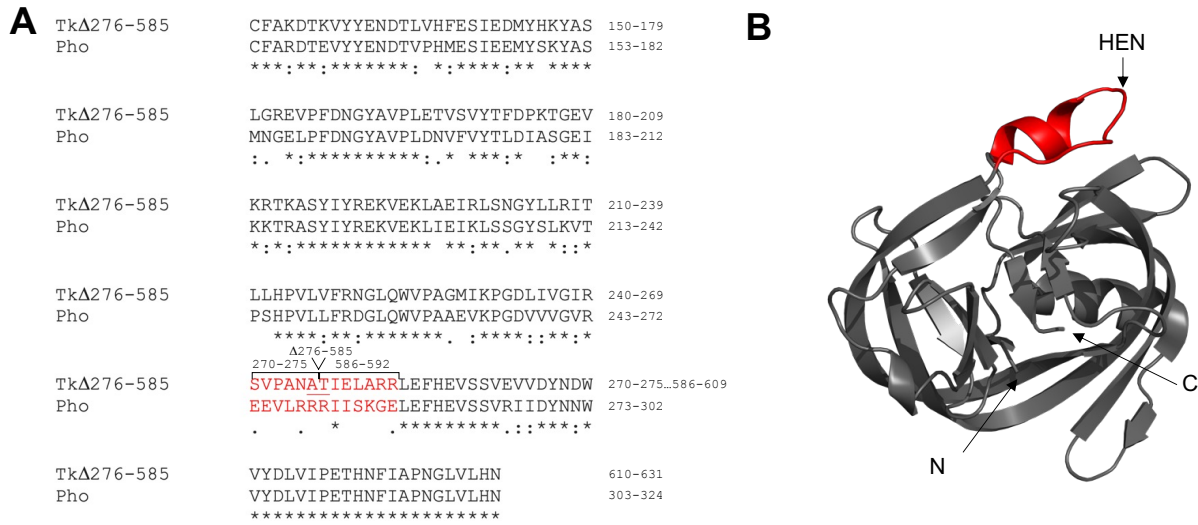

**Fig. S3. Loop residues in the *P. horikoshii* RadA intein are important for splicing.**  
**(A, B)** Sequence alignment of the Tk-RadA<sup>Δ276-585</sup> and the Ph-RadA inteins reveals substantial congruence except for a 14 aa (highlighted in red) patch where the HEN domain of Tk-RadA is normally inserted. The divergent residues are known to form a short helix and loop within the atomic structure of the *P. horikoshii* RadA-intein (right, in cartoon) that impacts the temperature-dependence of intein splicing.

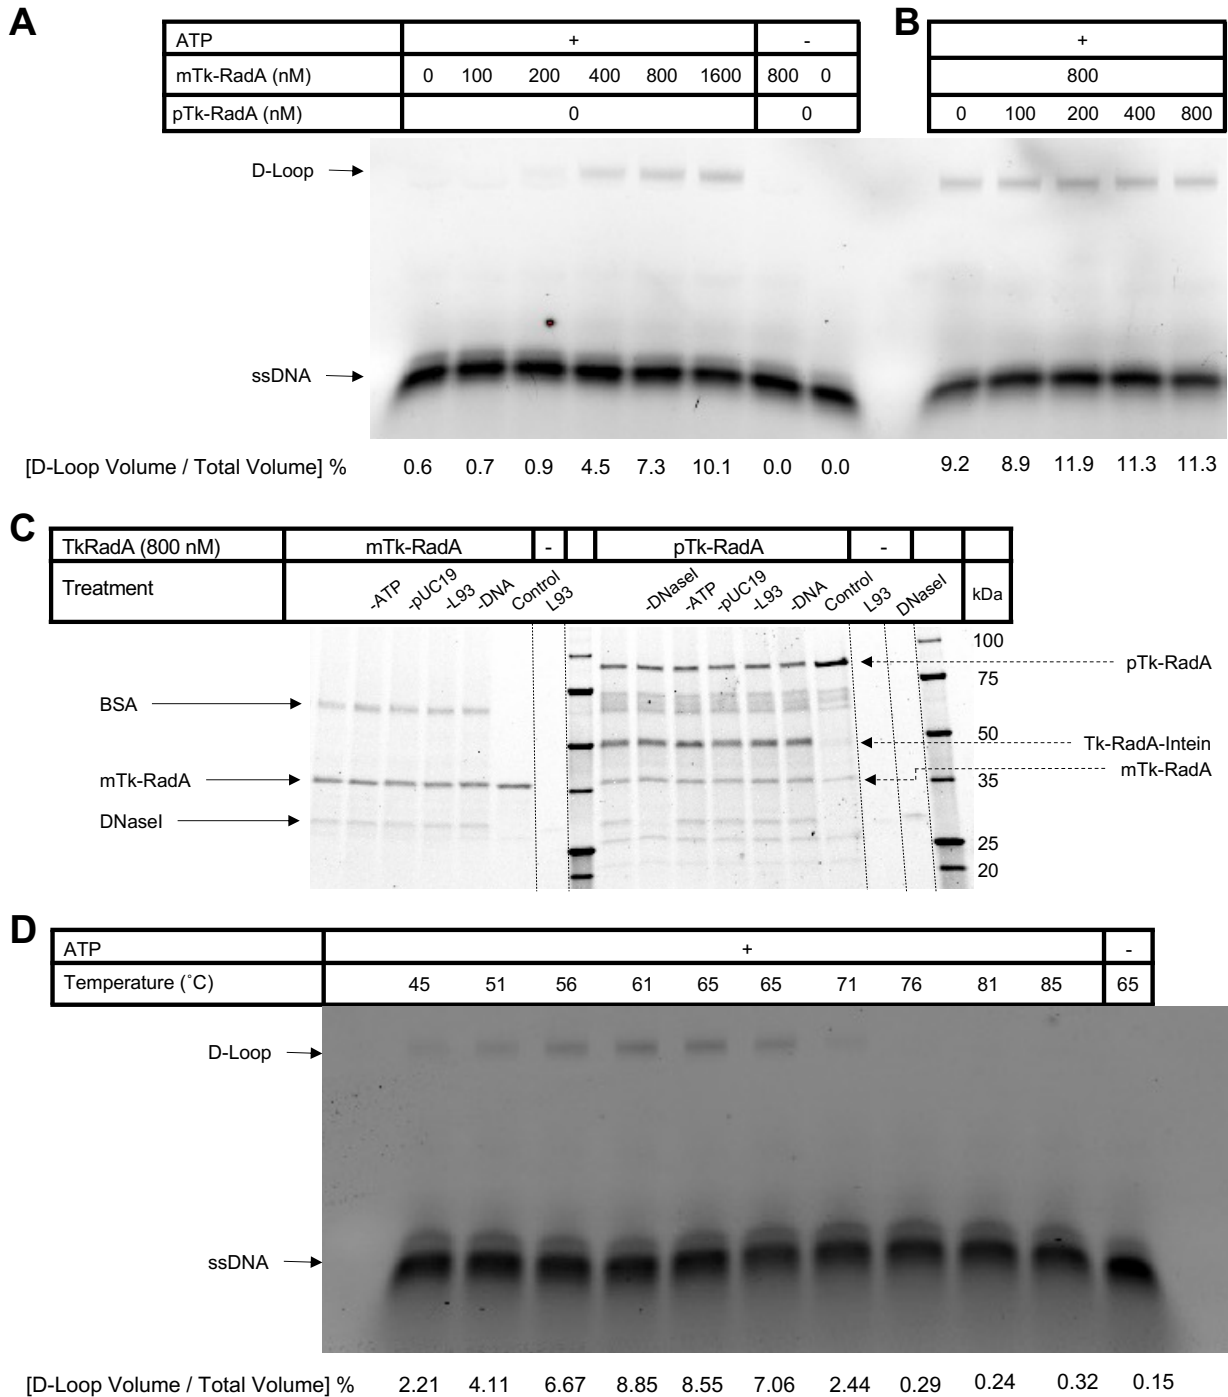

**Fig. S4. Precursor Tk-RadA does not inhibit recombinase activity of mature Tk-RadA.** Native TBE agarose gel electrophoresis visualized by fluorescence demonstrating mTk-RadA-mediated D-loop formation. **A-B.** mTk-RadA functions as a recombinase, catalyzing a protein-concentration and ATP-dependent invasion of a ssDNA into the supercoiled pUC19 plasmid forming a D-loop (**A**). Addition of pTk-RadA does not impact the efficiency of mTk-RadA recombinase activities (**B**). D-loop formation was quantified as the percentage of fluorescent oligo with retarded migration in each lane. **C.** SDS-PAGE of the purified proteins used in the D-

loop formation assays reveals an elevated splicing efficiency for pTk-RadA under our D-loop assay conditions. **D.** D-loop formation assay incubated at various temperatures, 45 – 85 °C, with a constant mTk-RadA concentration kept at 800 nM. D-loop formation were quantified from the ratio of [D-Loop Volume/Total Volume] %.
